# Supplementary material
Source: PubMed Central journal article supplement (PMC2206571)

**A**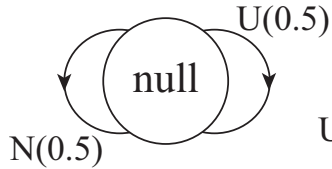**B**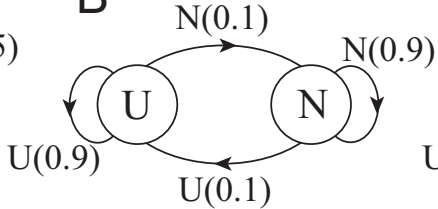**C**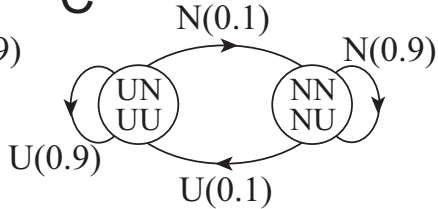

Supplement: pnas_0707378105_2.pdf [file pnas_0707378105_2.pdf]

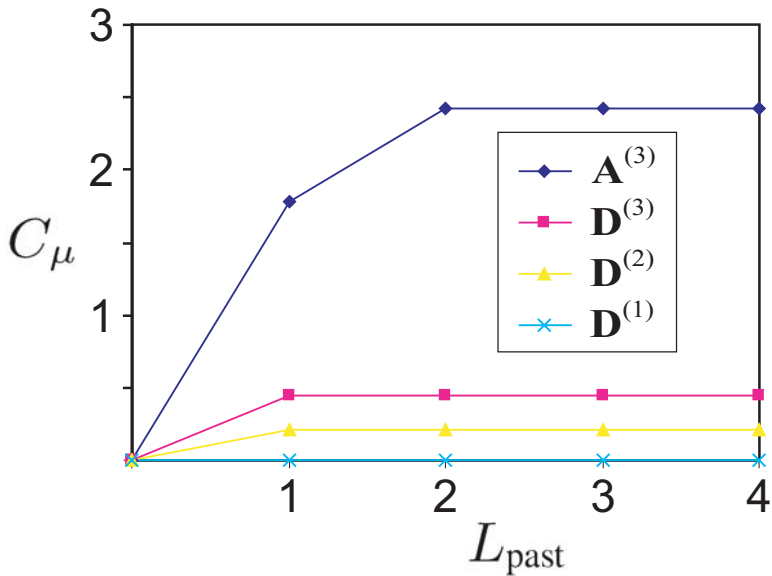

Supplement: pnas_0707378105_3.pdf [file pnas_0707378105_3.pdf]

autocorrelation

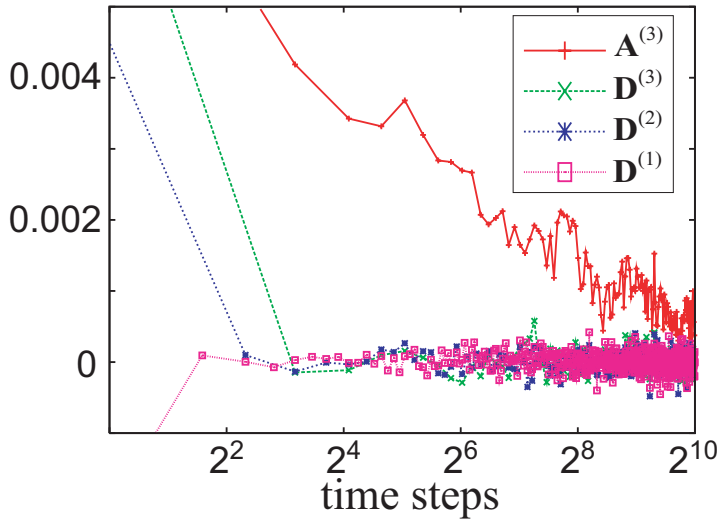

Supplement: pnas_0707378105_4.pdf [file pnas_0707378105_4.pdf]

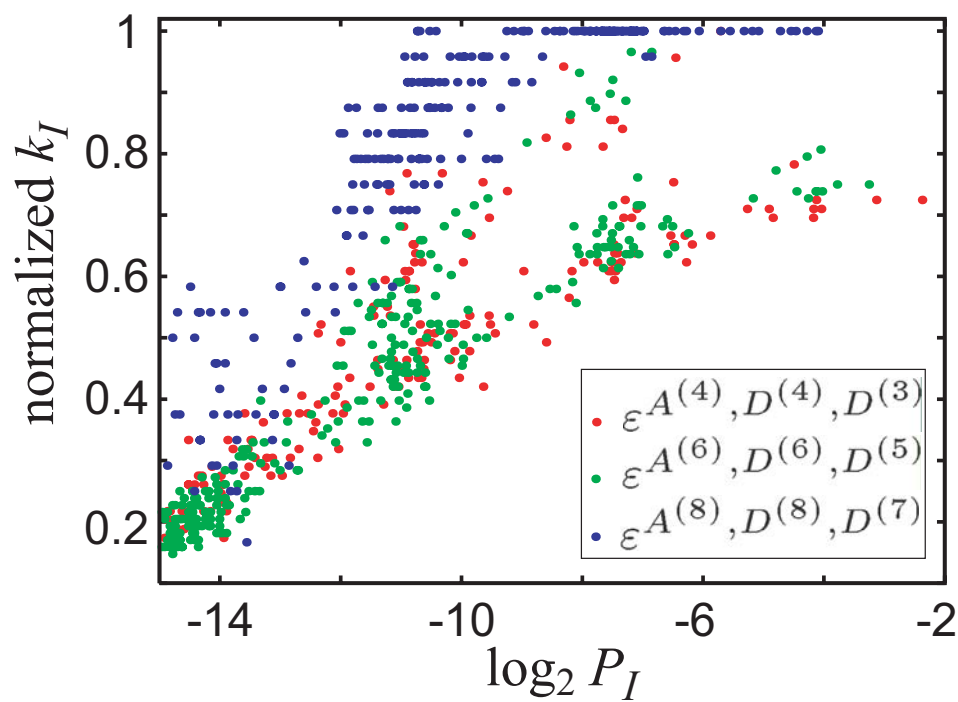

Supplement: pnas_0707378105_5.pdf [file pnas_0707378105_5.pdf]
